# Supplementary material
Source: Elsevier journal article supplement (https://www.sciencedirect.com/science/article/pii/S0377473221000559)
Supplement: mmc1 [file S0377473221000559:mmc1.doc]

**ANEXOS**

Tabla 1 Síndrome de Alienación Parental: según Gardner surgiría de la concurrencia de ocho síntomas presentes en el niño:

1. Una campaña de denigración de un hijo hacia uno de sus progenitores.

2. Racionalizaciones débiles, absurdas, o frívolas para la desaprobación.

3. Ausencia de la ambivalencia que debería darse, según Gardner, en todas las relaciones humanas, mostrando, en cambio, un pensamiento dicotómico: el progenitor odiado es visto como "todo malo" y el progenitor amado es "todo bueno”.

4. El fenómeno del «pensador-independiente».

5. Apoyo reflexivo al progenitor alienante en el conflicto parental.

6. Ausencia de culpa sobre la crueldad y/o explotación hacia el progenitor alienado.

7. La presencia de escenarios prestados.

8. Extensión de la animosidad hacia los amigos y/o familia extendida del progenitor alienado.

Tabla 2 Definición de Alienación Parental según Darnall21

1) Una campaña intencional por parte de uno de los progenitores para descalificar al otro

2) Interfiriendo sistemáticamente en la relación del niño con el otro progenitor

3) Mostrando una resistencia constante o desobediencia a las determinaciones legales

Tabla 3 Afecciones clínicas y problemas recogidos en el DSM-5 que pueden coadyuvar a definir una situación de Alienación Parental

**1. El “Problema de relación entre padres e hijos” ahora cuenta con una discusión en el texto del DSM- 5 V61.20 (Z62.820) (p. 715):**

El análisis explica que los problemas cognitivos son un problema relacional entre progenitores e hijos, "son atribuciones negativas a las intenciones de otros, hostilidad o convertir a otro en chivo expiatorio, y sensación de distanciamiento sin motivo”. Lo anterior es una muy buena descripción de la experiencia del niño en la AP, ya que el niño atribuye persistentes intenciones negativas a los sentimientos y comportamientos del progenitor rechazado. También, el niño es persistentemente hostil al mismo y lo culpa por todo lo malo que sucede.

**2. “Niño afectado por relación parental conflictiva”: es una importante nueva categoría en el DSM- 5. V61.29 (Z62.898) (p. 716):**

Debe utilizarse "cuando el objeto de atención clínica son los efectos negativos de los desacuerdos de la relación entre los padres (por ejemplo, niveles elevados de conflicto, tensión o desprecios) sobre un niño de la familia, incluidos los efectos sobre un trastorno del niño, ya sea mental o médico o de cualquier tipo”. La misma, según Bernet, es una muy buena descripción sobre lo que produce la alienación parental. Es decir, la AP por lo general aparece durante el curso de una separación o divorcio altamente conflictivo y que casi siempre implica menosprecio persistente hacia el progenitor alienado que es rechazado por el progenitor alienador.

**3. “Maltrato psicológico infantil” es otra nueva categoría en el DSM- 5. 995.51 (T74.32XA) (T74.32XD); V61.21 (Z69.010) (Z69.020); V15.42 (Z62.811); V61.22 (Z69.011); (V62.83) (Z69.021) (p.719)**:

Se define como “actos no accidentales, verbales o simbólicos, realizados por un progenitor o un cuidador de un niño que provoquen o generen una probabilidad razonable de causar un daño psicológico en el niño". En los casos de AP, el comportamiento del progenitor alienador constituiría un claro maltrato psicológico infantil.

**4. Síntomas delirantes en la pareja de un individuo con trastorno delirante es la terminología DSM- 5 para el trastorno psicótico compartido o folie à deux (“Otro trastorno del espectro de la esquizofrenia especificado y otro trastorno psicótico”. 298.8 (F28) (p. 122)**:

"En el contexto de una relación de pareja, el miembro dominante puede traspasar su delirio al otro, sin que por ello éste último deba cumplir de forma precisa los criterios del trastorno delirante”.

En casos graves de AP, las obsesiones del progenitor alienador se convierten en ideas delirantes acerca del progenitor alienado que son compartidas con la hija o hijo31.

**5. “Trastorno facticio aplicado a otro” es la terminología del DSM- 5 para el trastorno facticio por poderes o trastorno de Münchausen por poderes. 300.19 (F68.10) (p. 325):**

Se define como "falsificación de signos y/o síntomas físicos o psicológicos, o inducción de lesión o enfermedad en otro, asociada a un engaño identificado”. En algunos casos de AP, describe el comportamiento del progenitor alienador.
